# Supplementary material for: Greater involvement of HIV-infected peer-mothers in provision of reproductive health services as “family planning champions” increases referrals and uptake of family planning among HIV-infected mothers
Source: BMC Health Serv Res. 2017 Jun 27;17:444. doi: 10.1186/s12913-017-2386-x (PMC5488413; doi:10.1186/s12913-017-2386-x)
Supplement: Additional file 1: — Data set in Excel. (XLSX 18 kb) [file 12913_2017_2386_MOESM1_ESM.xlsx]

## Sheet: Sheet1
week	interventperiod	N_postvmother	N_useFP	N_notuseFP	N_postveTotal_referred	N_receivedFP	N_revists	N_newaccpt	N_total_revnewaccpt	N_needFP	Intvent_1	weekaftr_Intvent1	Intvent_2	weekaftr_Intvent2	frac_N_useFP	frac_N_notuseFP	frac_N_postveTotal_referred	frac_N_receivedrefFP	newfrac_N_receivedFP	frac_adjustNotuse_need	fracrecvdperattend	fracreferrdattend	fra_revisits	frac_newvisits	frac_refd_need
1	0	146	92	54	30	26	19	20	39	39	0	0	0	0	63.0137	36.9863	55.5556	86.6667	48.1482	66.6667	17.8082	20.548	48.718	51.282	0.769231
2	0	392	254	138	72	61	40	58	98	99	0	0	0	0	64.7959	35.2041	52.1739	84.7222	44.2029	61.6162	15.5612	18.3673	40.8163	59.1837	0.727273
3	0	525	346	179	76	62	28	67	95	129	0	0	0	0	65.9048	34.0952	42.4581	81.579	34.6369	48.062	11.8095	14.4762	29.4737	70.5263	0.589147
4	0	611	393	218	94	86	46	90	136	157	0	0	0	0	64.3208	35.6792	43.1193	91.4894	39.4495	54.7771	14.0753	15.3846	33.8235	66.1765	0.598726
5	0	543	377	166	80	69	43	63	106	120	0	0	0	0	69.4291	30.5709	48.1928	86.25	41.5663	57.5	12.7072	14.733	40.566	59.434	0.666667
6	0	486	298	188	72	66	29	53	82	135	0	0	0	0	61.3169	38.6831	38.2979	91.6667	35.1064	48.8889	13.5802	14.8148	35.3659	64.6342	0.533333
7	0	449	273	176	51	43	33	28	61	127	0	0	0	0	60.8018	39.1982	28.9773	84.3137	24.4318	33.8583	9.57684	11.3586	54.0984	45.9016	0.401575
8	0	494	330	164	51	42	33	56	89	118	0	0	0	0	66.8016	33.1984	31.0976	82.3529	25.6098	35.5932	8.50202	10.3239	37.0787	62.9213	0.432203
9	0	534	352	182	77	58	17	73	90	131	0	0	0	0	65.9176	34.0824	42.3077	75.3247	31.8681	44.2748	10.8614	14.4195	18.8889	81.1111	0.587786
10	0	591	390	201	51	48	11	60	71	145	0	0	0	0	65.9899	34.0102	25.3731	94.1176	23.8806	33.1035	8.12183	8.62944	15.493	84.507	0.351724
11	0	473	317	156	41	36	12	50	62	112	0	0	0	0	67.019	32.981	26.2821	87.8049	23.0769	32.1429	7.61099	8.66808	19.3548	80.6452	0.366071
12	0	603	385	218	64	55	19	42	61	157	0	0	0	0	63.8474	36.1526	29.3578	85.9375	25.2294	35.0318	9.12106	10.6136	31.1475	68.8525	0.407643
13	0	326	192	134	48	42	22	53	75	96	0	0	0	0	58.8957	41.1043	35.8209	87.5	31.3433	43.75	12.8834	14.7239	29.3333	70.6667	0.5
14	1	43	20	23	18	16	8	14	22	17	1	1	0	0	46.5116	53.4884	78.2609	88.8889	69.5652	94.1176	37.2093	41.8605	36.3636	63.6364	1
15	1	278	178	100	44	42	22	37	59	72	1	2	0	0	64.0288	35.9712	44	95.4545	42	58.3333	15.1079	15.8273	37.2881	62.7119	0.611111
16	1	614	431	183	66	61	23	59	82	132	1	3	0	0	70.1954	29.8046	36.0656	92.4242	33.3333	46.2121	9.93485	10.7492	28.0488	71.9512	0.5
17	1	580	378	202	76	68	28	60	88	145	1	4	0	0	65.1724	34.8276	37.6238	89.4737	33.6634	46.8965	11.7241	13.1035	31.8182	68.1818	0.524138
18	1	626	410	216	72	65	32	67	99	156	1	5	0	0	65.4952	34.5048	33.3333	90.2778	30.0926	41.6667	10.3834	11.5016	32.3232	67.6768	0.461539
19	1	398	296	102	55	54	33	36	69	73	1	6	0	0	74.3719	25.6281	53.9216	98.1818	52.9412	73.9726	13.5678	13.8191	47.8261	52.1739	0.753425
20	1	472	386	86	53	49	28	39	67	62	1	7	0	0	81.7797	18.2203	61.6279	92.4528	56.9768	79.0323	10.3814	11.2288	41.791	58.209	0.854839
21	1	430	329	101	54	49	23	49	72	73	1	8	0	0	76.5116	23.4884	53.4654	90.7407	48.5149	67.1233	11.3954	12.5581	31.9444	68.0556	0.739726
22	1	420	342	78	64	61	30	57	87	56	1	9	0	0	81.4286	18.5714	82.0513	95.3125	78.2051	100	14.5238	15.2381	34.4828	65.5172	1
23	1	521	436	85	57	54	31	61	92	61	1	10	0	0	83.6852	16.3148	67.0588	94.7368	63.5294	88.5246	10.3647	10.9405	33.6957	66.3043	0.934426
24	1	552	439	113	83	83	33	73	106	81	1	11	0	0	79.529	20.471	73.4513	100	73.4513	100	15.0362	15.0362	31.1321	68.8679	1
25	1	419	339	80	56	56	23	60	83	58	1	12	0	0	80.9069	19.0931	70	100	70	96.5517	13.3652	13.3652	27.7108	72.2892	0.965517
26	1	431	343	88	66	66	18	56	74	63	1	13	0	0	79.5824	20.4176	75	100	75	100	15.3132	15.3132	24.3243	75.6757	1
27	1	438	361	77	56	56	24	59	83	55	1	14	0	0	82.4201	17.5799	72.7273	100	72.7273	100	12.7854	12.7854	28.9157	71.0843	1
28	1	576	481	95	68	67	35	65	100	68	1	15	0	0	83.5069	16.4931	71.579	98.5294	70.5263	98.5294	11.6319	11.8056	35	65	1
29	1	366	311	55	35	31	27	49	76	40	1	16	0	0	84.9727	15.0273	63.6364	88.5714	56.3636	77.5	8.46994	9.56284	35.5263	64.4737	0.875
30	1	552	442	110	82	81	43	81	124	79	1	17	0	0	80.0725	19.9275	74.5455	98.7805	73.6364	100	14.6739	14.8551	34.6774	65.3226	1
31	1	423	350	73	55	55	30	52	82	53	1	18	0	0	82.7423	17.2577	75.3425	100	75.3425	100	13.0024	13.0024	36.5854	63.4146	1
32	1	382	321	61	44	44	30	64	94	44	1	19	0	0	84.0314	15.9686	72.1312	100	72.1312	100	11.5183	11.5183	31.9149	68.0851	1
33	1	460	366	94	67	63	52	61	113	68	1	20	0	0	79.5652	20.4348	71.2766	94.0298	67.0213	92.6471	13.6957	14.5652	46.0177	53.9823	0.985294
34	1	454	347	107	66	65	32	65	97	91	1	21	0	0	76.4317	23.5683	61.6822	98.4848	60.7477	71.4286	14.3172	14.5374	32.9897	67.0103	0.725275
35	1	428	339	89	57	56	28	68	96	63	1	22	0	0	79.2056	20.7944	64.0449	98.2456	62.9213	88.8889	13.0841	13.3178	29.1667	70.8333	0.904762
36	1	487	399	88	61	59	28	74	102	67	1	23	0	0	81.9302	18.0698	69.3182	96.7213	67.0455	88.0597	12.115	12.5257	27.451	72.549	0.910448
37	1	425	333	92	57	53	21	61	82	73	1	24	0	0	78.3529	21.6471	61.9565	92.9825	57.6087	72.6027	12.4706	13.4118	25.6098	74.3902	0.780822
38	1	376	296	80	50	49	23	56	79	61	1	25	0	0	78.7234	21.2766	62.5	98	61.25	80.3279	13.0319	13.2979	29.1139	70.8861	0.819672
39	1	409	332	77	43	39	27	49	76	66	1	26	0	0	81.1736	18.8264	55.8441	90.6977	50.6493	59.0909	9.53545	10.5135	35.5263	64.4737	0.651515
40	1	514	405	109	51	51	24	57	81	89	1	27	0	0	78.7938	21.2062	46.789	100	46.789	57.3034	9.92218	9.92218	29.6296	70.3704	0.573034
41	2	416	317	99	51	47	29	46	75	61	1	28	1	1	76.2019	23.7981	51.5151	92.1569	47.4748	77.0492	11.2981	12.2596	38.6667	61.3333	0.836066
42	2	474	369	105	51	48	30	51	81	74	1	29	1	2	77.8481	22.1519	48.5714	94.1176	45.7143	64.8649	10.1266	10.7595	37.037	62.963	0.689189
43	2	526	408	118	50	43	35	47	82	70	1	30	1	3	77.5665	22.4335	42.3729	86	36.4407	61.4286	8.17491	9.5057	42.6829	57.3171	0.714286
44	2	431	334	97	33	25	32	31	63	73	1	31	1	4	77.4942	22.5058	34.0206	75.7576	25.7732	34.2466	5.80046	7.65661	50.7936	49.2064	0.452055
45	2	423	339	84	47	38	24	40	64	62	1	32	1	5	80.1419	19.8582	55.9524	80.8511	45.2381	61.2903	8.98345	11.1111	37.5	62.5	0.758065
46	2	423	326	97	57	55	41	49	90	75	1	33	1	6	77.0686	22.9314	58.7629	96.4912	56.701	73.3333	13.0024	13.4752	45.5556	54.4444	0.76
47	2	491	398	93	54	54	22	65	87	76	1	34	1	7	81.0591	18.9409	58.0645	100	58.0645	71.0526	10.998	10.998	25.2874	74.7126	0.710526
48	2	491	391	100	41	40	24	40	64	62	1	35	1	8	79.6334	20.3666	41	97.561	40	64.5161	8.14664	8.35031	37.5	62.5	0.66129
49	2	459	367	92	36	36	32	34	66	51	1	36	1	9	79.9564	20.0436	39.1304	100	39.1304	70.5882	7.84314	7.84314	48.4849	51.5151	0.705882
50	2	419	320	99	49	43	22	47	69	77	1	37	1	10	76.3723	23.6277	49.495	87.7551	43.4344	55.8441	10.2625	11.6945	31.8841	68.1159	0.636364
51	2	453	371	82	45	42	19	44	63	66	1	38	1	11	81.8984	18.1015	54.8781	93.3333	51.2195	63.6364	9.27152	9.93378	30.1587	69.8413	0.681818
52	2	463	399	64	42	41	26	38	64	49	1	39	1	12	86.1771	13.8229	65.625	97.6191	64.0625	83.6735	8.85529	9.07127	40.625	59.375	0.857143
53	2	424	349	75	28	28	27	31	58	41	1	40	1	13	82.3113	17.6887	37.3333	100	37.3333	68.2927	6.60377	6.60377	46.5517	53.4483	0.682927
